# Supplementary material
Source: PubMed Central journal article supplement (PMC10394183)
Supplement: jmcp.2021.21192_s001.pdf [file jmcp.2021.21192_s001.pdf]

## **SUPPLEMENTARY MATERIALS**

### **Real-world evidence for option value in metastatic melanoma**

William B Wong, PharmD, MS; Tu My To, PhD; Meng Li, ScM, PhD; Woojung Lee, PharmD; David L Veenstra, PharmD, PhD; and Louis P Garrison Jr, PhD

### **Supplementary Figure 1. Study Design**

### **Supplementary Table 1. Patient Characteristics**

# Supplementary Figure 1. Study Design

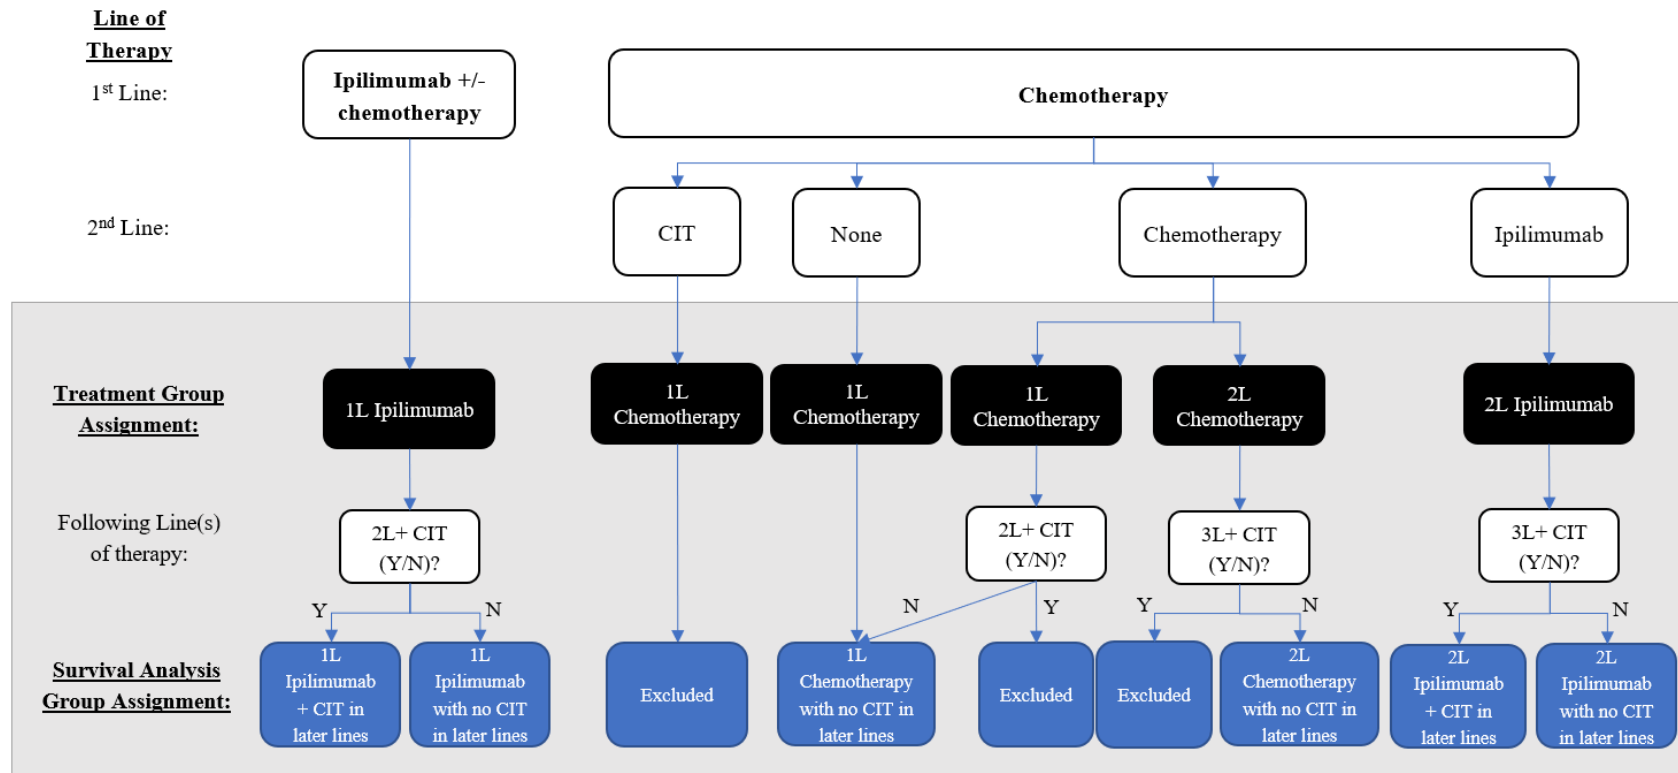

**Supplementary Table 1. Patient Characteristics**

|                                           | First Line (N=576)          |                         |                             | Second Line (N=157)            |                                                            |                             |
|-------------------------------------------|-----------------------------|-------------------------|-----------------------------|--------------------------------|------------------------------------------------------------|-----------------------------|
|                                           | First-Line Ipilimumab (any) | First-Line Chemotherapy | <i>P</i> Value <sup>a</sup> | Second-Line Ipilimumab + (any) | Second-Line Chemotherapy (Different Agent from First Line) | <i>P</i> Value <sup>b</sup> |
| Patients, n (%)                           | 458 (80)                    | 118 (20)                |                             | 124 (79)                       | 33 (21)                                                    |                             |
| <b>Age at treatment start, years</b>      |                             |                         |                             |                                |                                                            |                             |
| Mean (SD)                                 | 65.31 (12.14)               | 67.32 (12.25)           | 0.08                        | 59.74 (13.36)                  | 60.52 (16)                                                 | 0.54                        |
| Median                                    | 68                          | 72                      | NA                          | 60                             | 62                                                         | NA                          |
| <b>Gender, n (%)</b>                      |                             |                         |                             |                                |                                                            |                             |
| Female                                    | 133 (29)                    | 34 (29)                 | 0.96                        | 36(29)                         | 11(33)                                                     | 0.63                        |
| Male                                      | 325 (71)                    | 84 (71)                 |                             | 88 (71)                        | 22 (67)                                                    |                             |
| <b>Practice type, n (%)</b>               |                             |                         |                             |                                |                                                            |                             |
| Academic                                  | 59 (13)                     | 18 (15)                 | 0.50                        | 18 (15)                        | 5 (15)                                                     | 0.93                        |
| Community                                 | 399 (87)                    | 100 (85)                |                             | 106 (85)                       | 28 (85)                                                    |                             |
| <b>Insurance, n (%)</b>                   |                             |                         |                             |                                |                                                            |                             |
| Any Medicaid                              | 10 (2)                      | 3 (3)                   | 0.09                        | 5 (4)                          | 1 (3)                                                      | 0.75                        |
| Commercial                                | 66 (14)                     | 8 (7)                   |                             | 17 (14)                        | 6 (18)                                                     |                             |
| Medicare (±Commercial)                    | 31 (7)                      | 5 (4)                   |                             | 3 (2)                          | 0 (0)                                                      |                             |
| Unknown/Missing                           | 351 (77)                    | 102 (86)                |                             | 99 (80)                        | 26 (79)                                                    |                             |
| <b>Stage at advanced diagnosis, n (%)</b> |                             |                         |                             |                                |                                                            |                             |
| III                                       | 130 (28)                    | 32 (27)                 | 0.79                        | 50 (40)                        | 13 (39)                                                    | 0.92                        |
| IV                                        | 328 (72)                    | 86 (73)                 |                             | 74 (60)                        | 20 (61)                                                    |                             |
| <b>Region, n (%)</b>                      |                             |                         |                             |                                |                                                            |                             |
| Midwest                                   | 47 (10)                     | 17 (14)                 | 0.08                        | 9 (7)                          | 4 (12)                                                     | 0.77                        |
| Northeast                                 | 72 (16)                     | 24 (20)                 |                             | 21 (17)                        | 4 (12)                                                     |                             |
| South                                     | 169 (37)                    | 29 (25)                 |                             | 39 (31)                        | 11 (33)                                                    |                             |
| West                                      | 99 (22)                     | 25 (21)                 |                             | 26 (21)                        | 7 (21)                                                     |                             |

|                                                     |          |          |        |          |          |      |
|-----------------------------------------------------|----------|----------|--------|----------|----------|------|
| Unknown/Missing                                     | 71 (16)  | 23 (19)  |        | 29 (23)  | 7 (21)   |      |
| <b>ECOG performance status, n (%)</b>               |          |          |        |          |          |      |
| 0–1                                                 | 44 (10)  | 9 (8)    | 0.54   | 9 (7)    | 2 (6)    | 0.85 |
| 2+                                                  | 3 (1)    | 0 (0)    |        | 1 (1)    | 0 (0)    |      |
| Missing                                             | 411 (90) | 109 (92) |        | 114 (92) | 31 (94)  |      |
| <b>Metastatic site at advanced diagnosis, n (%)</b> |          |          |        |          |          |      |
| Brain/liver/lung                                    | 250 (55) | 73 (62)  | 0.23   | 57 (46)  | 15 (45)  | 0.89 |
| Other                                               | 77 (17)  | 13 (11)  |        | 15 (12)  | 5 (15)   |      |
| None                                                | 131 (29) | 32 (27)  |        | 52 (42)  | 13 (39)  |      |
| <b>BRAF status, n (%)</b>                           |          |          |        |          |          |      |
| Negative                                            | 325 (71) | 88 (75)  | 0.03   | 47 (38)  | 14 (42)  | 0.07 |
| Positive                                            | 112 (24) | 19 (16)  |        | 75 (60)  | 16 (48)  |      |
| Not tested                                          | 21 (5)   | 11 (9)   |        | 2 (2)    | 3 (9)    |      |
| <b>Year of treatment start, n (%)</b>               |          |          |        |          |          |      |
| 2011                                                | 16 (3)   | 31 (26)  | <0.001 | 6 (5)    | 5 (1)    | 0.19 |
| 2012                                                | 60 (13)  | 26 (22)  |        | 18 (15)  | 5 (15)   |      |
| 2013                                                | 101 (22) | 29 (25)  |        | 37 (30)  | 10 (30)  |      |
| 2014                                                | 203 (44) | 27 (23)  |        | 48 (39)  | 12 (36)  |      |
| 2015                                                | 78 (17)  | 5 (4)    |        | 15 (12)  | 1 (3)    |      |
| <b>Progressed/died, n (%)</b>                       |          |          |        |          |          |      |
| No                                                  | 101 (22) | 6 (5)    | <0.001 | 2 (2)    | 0 (0)    | 0.46 |
| Yes                                                 | 357 (78) | 112 (95) |        | 122 (98) | 33 (100) |      |

<sup>a</sup>*P* values are a comparison between the two treatments used as first-line. <sup>b</sup>*P* values are a comparison between the two treatments used as second-line. Wilcoxon test or Chi-squared test statistics were used to compare differences in baseline patient characteristics by treatment group at 1L and 2L. + (any) = ipilimumab as monotherapy or in combination with other therapies; ECOG = Eastern Cooperative Oncology Group; SD = standard deviation; NA = not applicable.
